# Supplementary material for: ST3GalIV drives SLeX biosynthesis in gastrointestinal cancer cells and associates with cancer cell motility
Source: PubMed Central journal article supplement (PMC10335957; doi:10.1007/s10719-023-10113-y), 2023-04-19
Supplement: 10719_2023_10113_MOESM1_ESM.pdf [file 10719_2023_10113_MOESM1_ESM.pdf]

**ST3GalIV KO on COLO205, LS174T,  
HT-29, NCI-N87 and Katolll  
gastrointestinal cancer cell lines**



# NCI-N87

WT

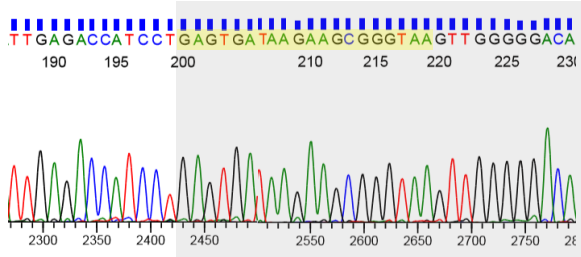

Clone 1

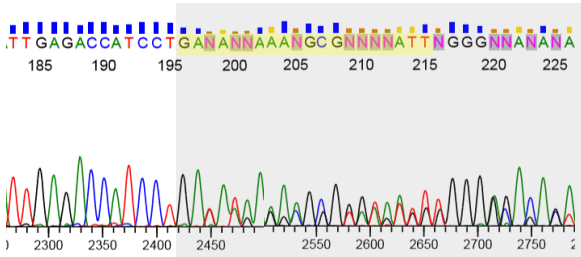

Clone 2

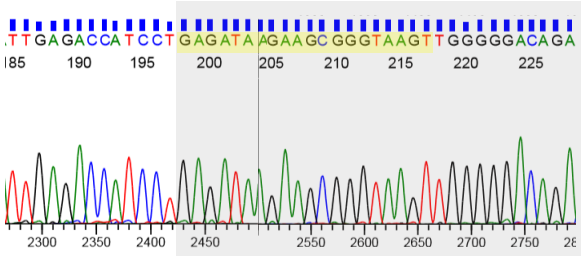

Clone 3

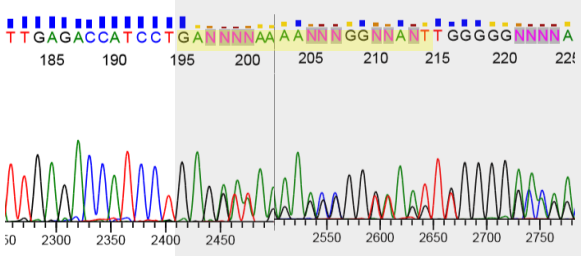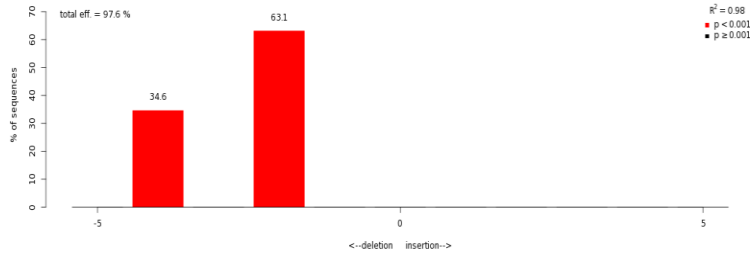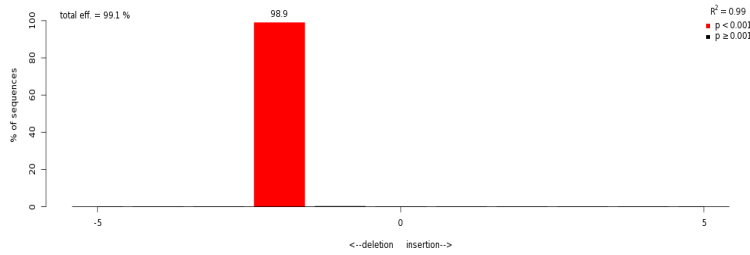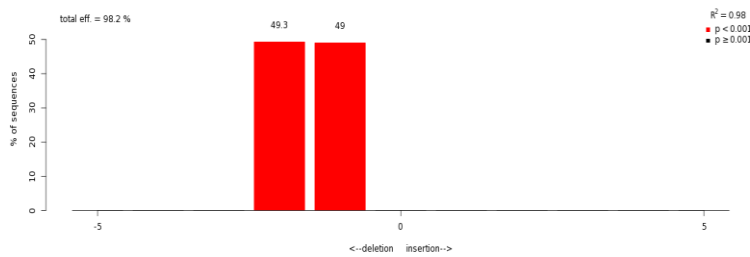



# LS174T

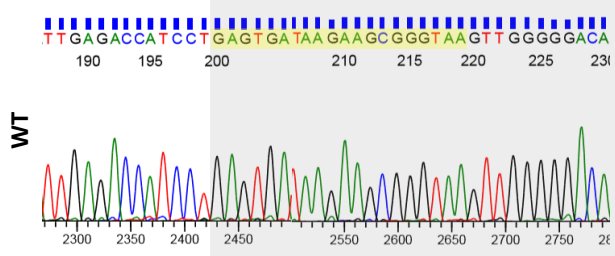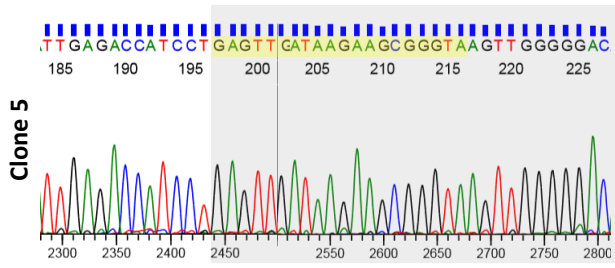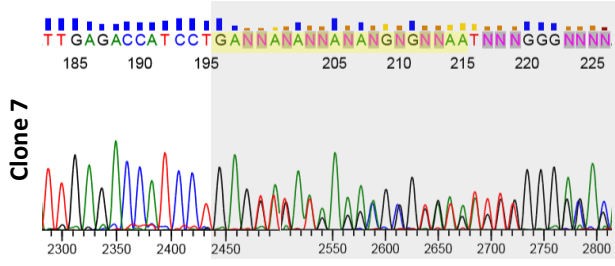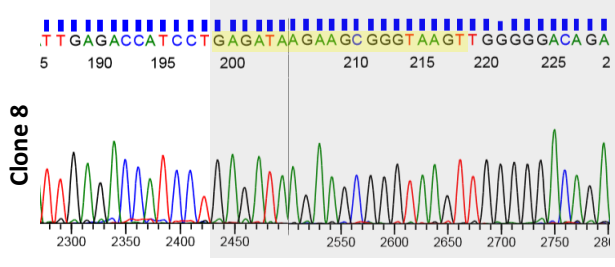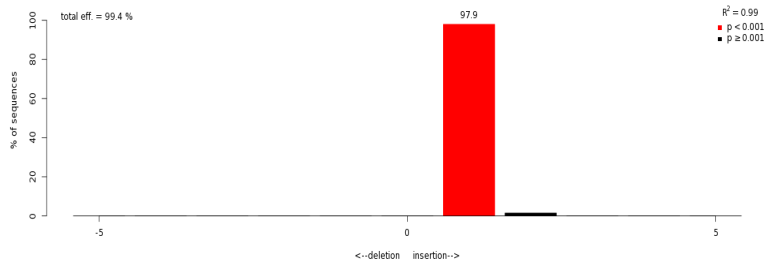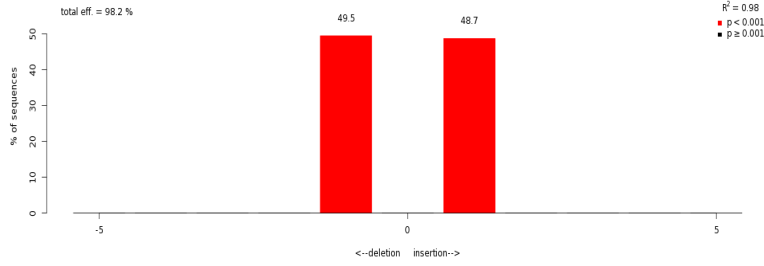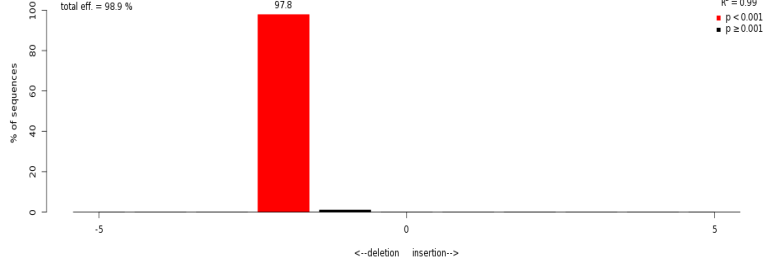

# Kato III

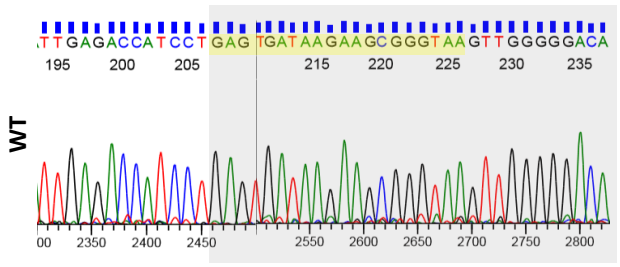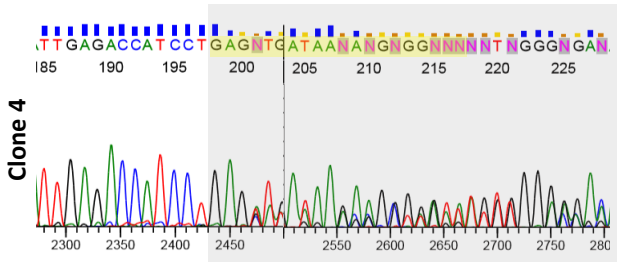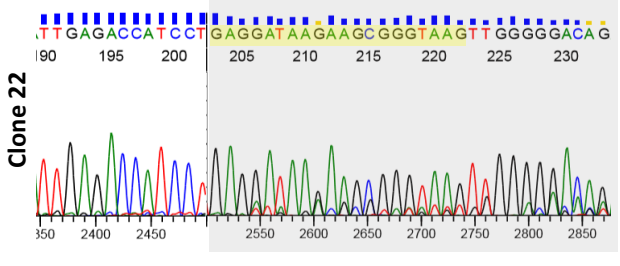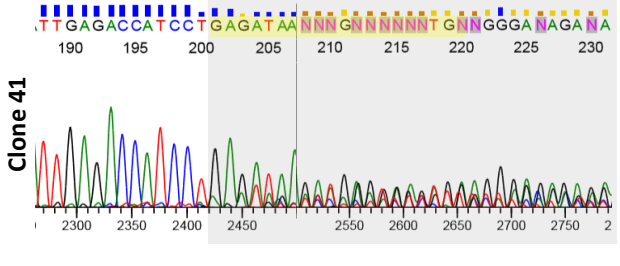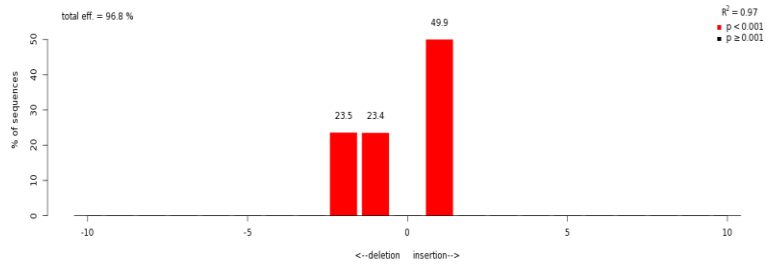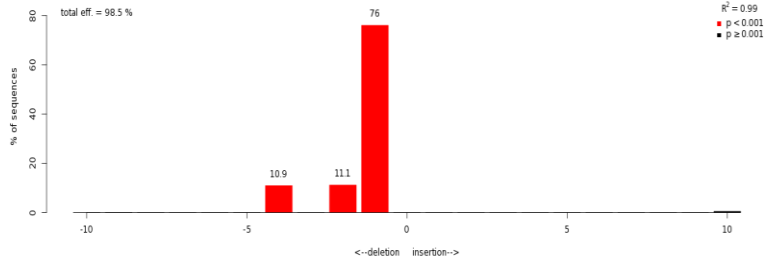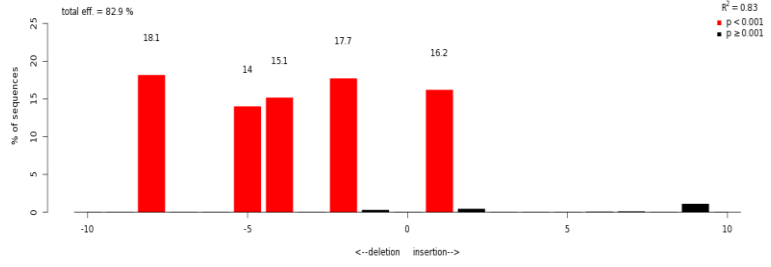

**ST3GalVI KO on LS174T colon  
cancer cell lines**

# LS174T

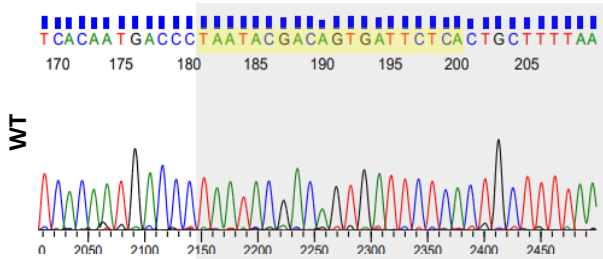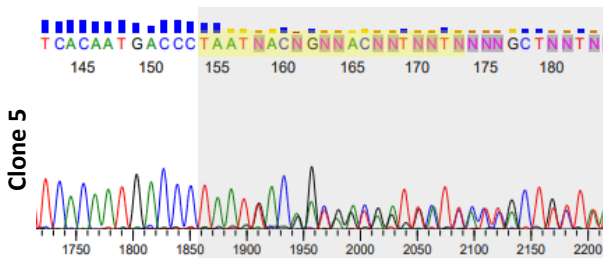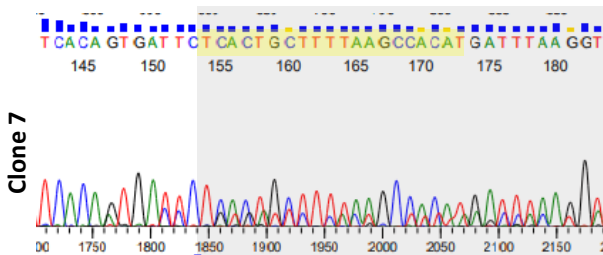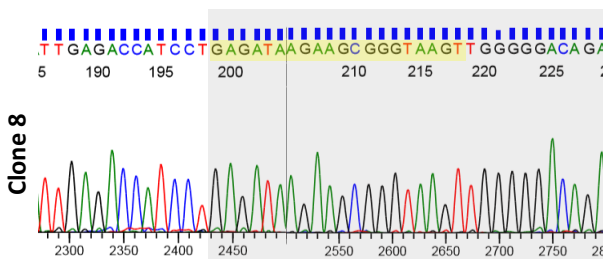

TGAGAATCACTGTCGTATTA

TAATACGACAGTGATTCTCA

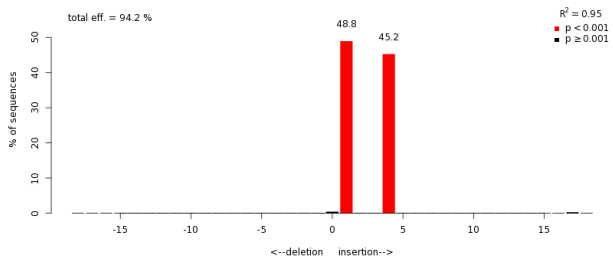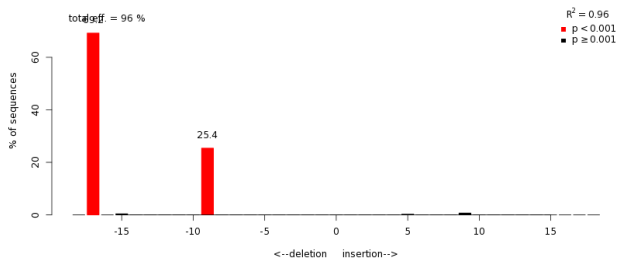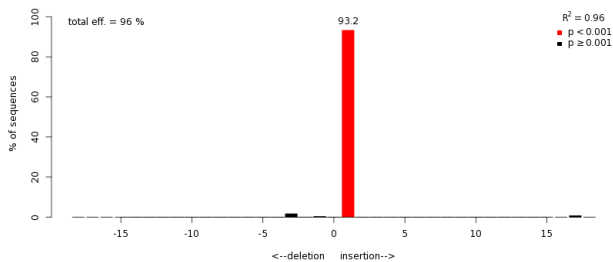



# LS174T

WT

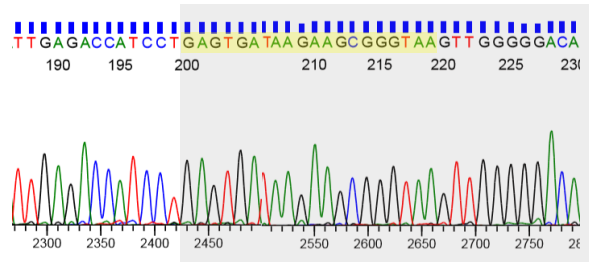

Clone 5

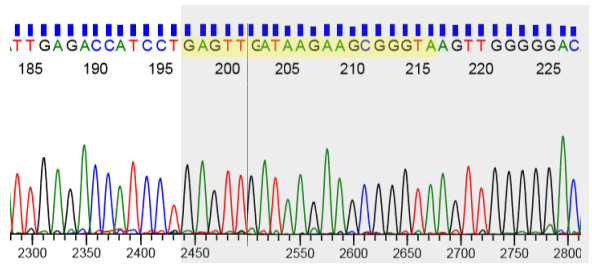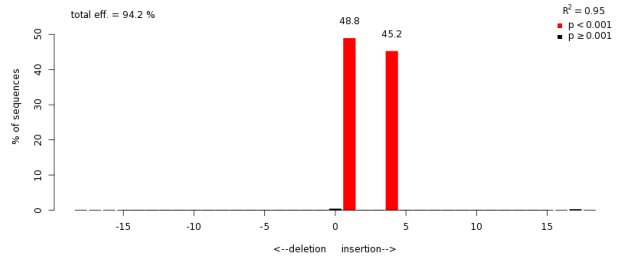

Clone 7

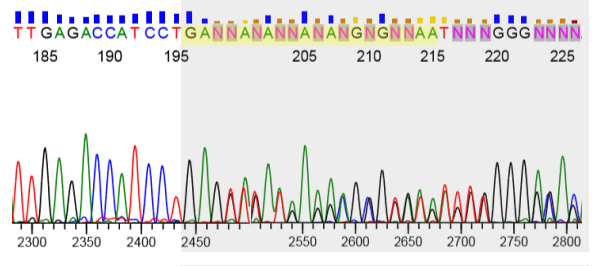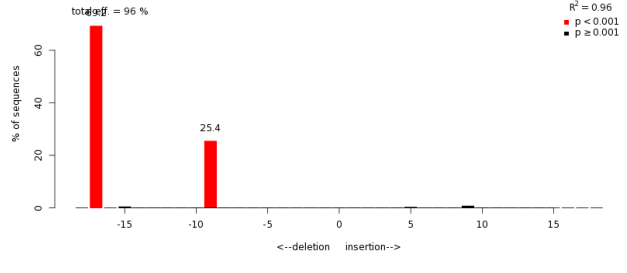

Clone 8

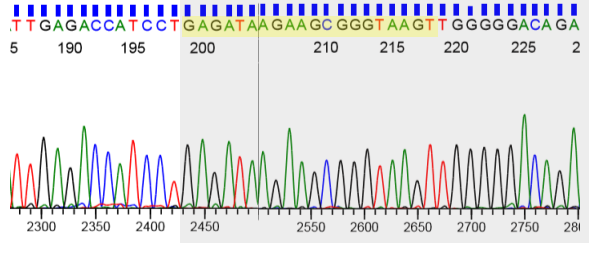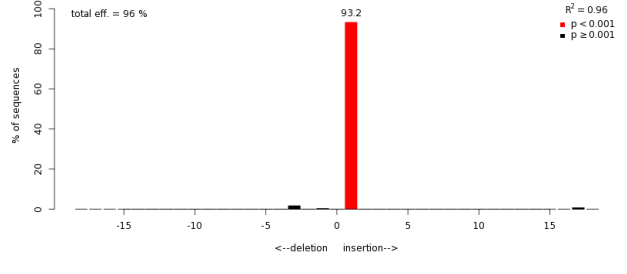

# SFig. 2

## SLeX (AlexaFluor 488) Mean Fluorescence Intensity

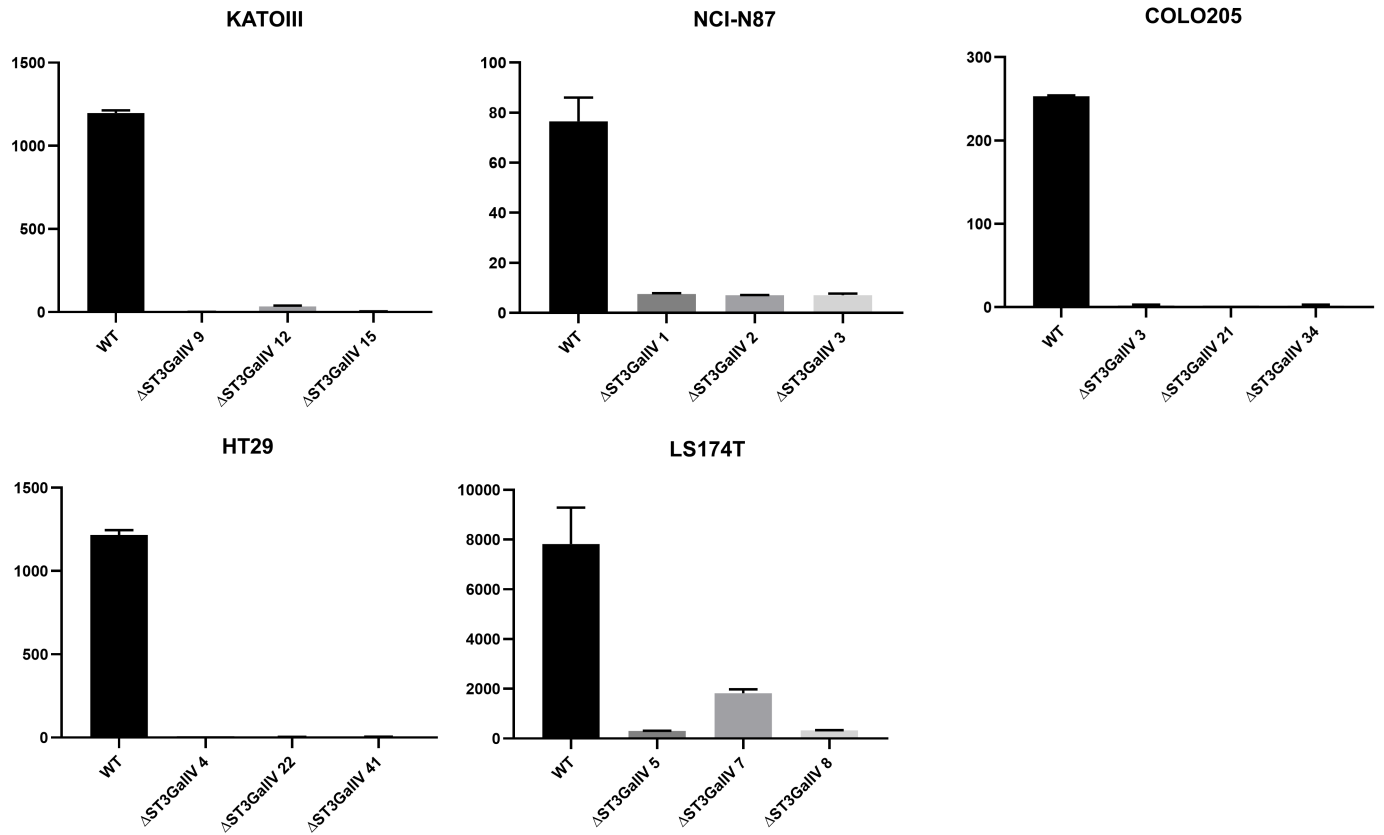

**SFig.2:** Mean fluorescence intensity levels of cell surface SLeX in WT and ST3GalIV KO clones of KATOIII, NCI-N87, COLO205, HT29 and LS174T cells. Intensity levels were quantified by flow cytometry analysis and shows the full abolishment of SLeX levels in the ST3GalIV KO cells. Bar graphs shows normalized mean intensity of fluorescence (MFI) + SEM, resulting from three independent biological experiments.

# SFig. 3

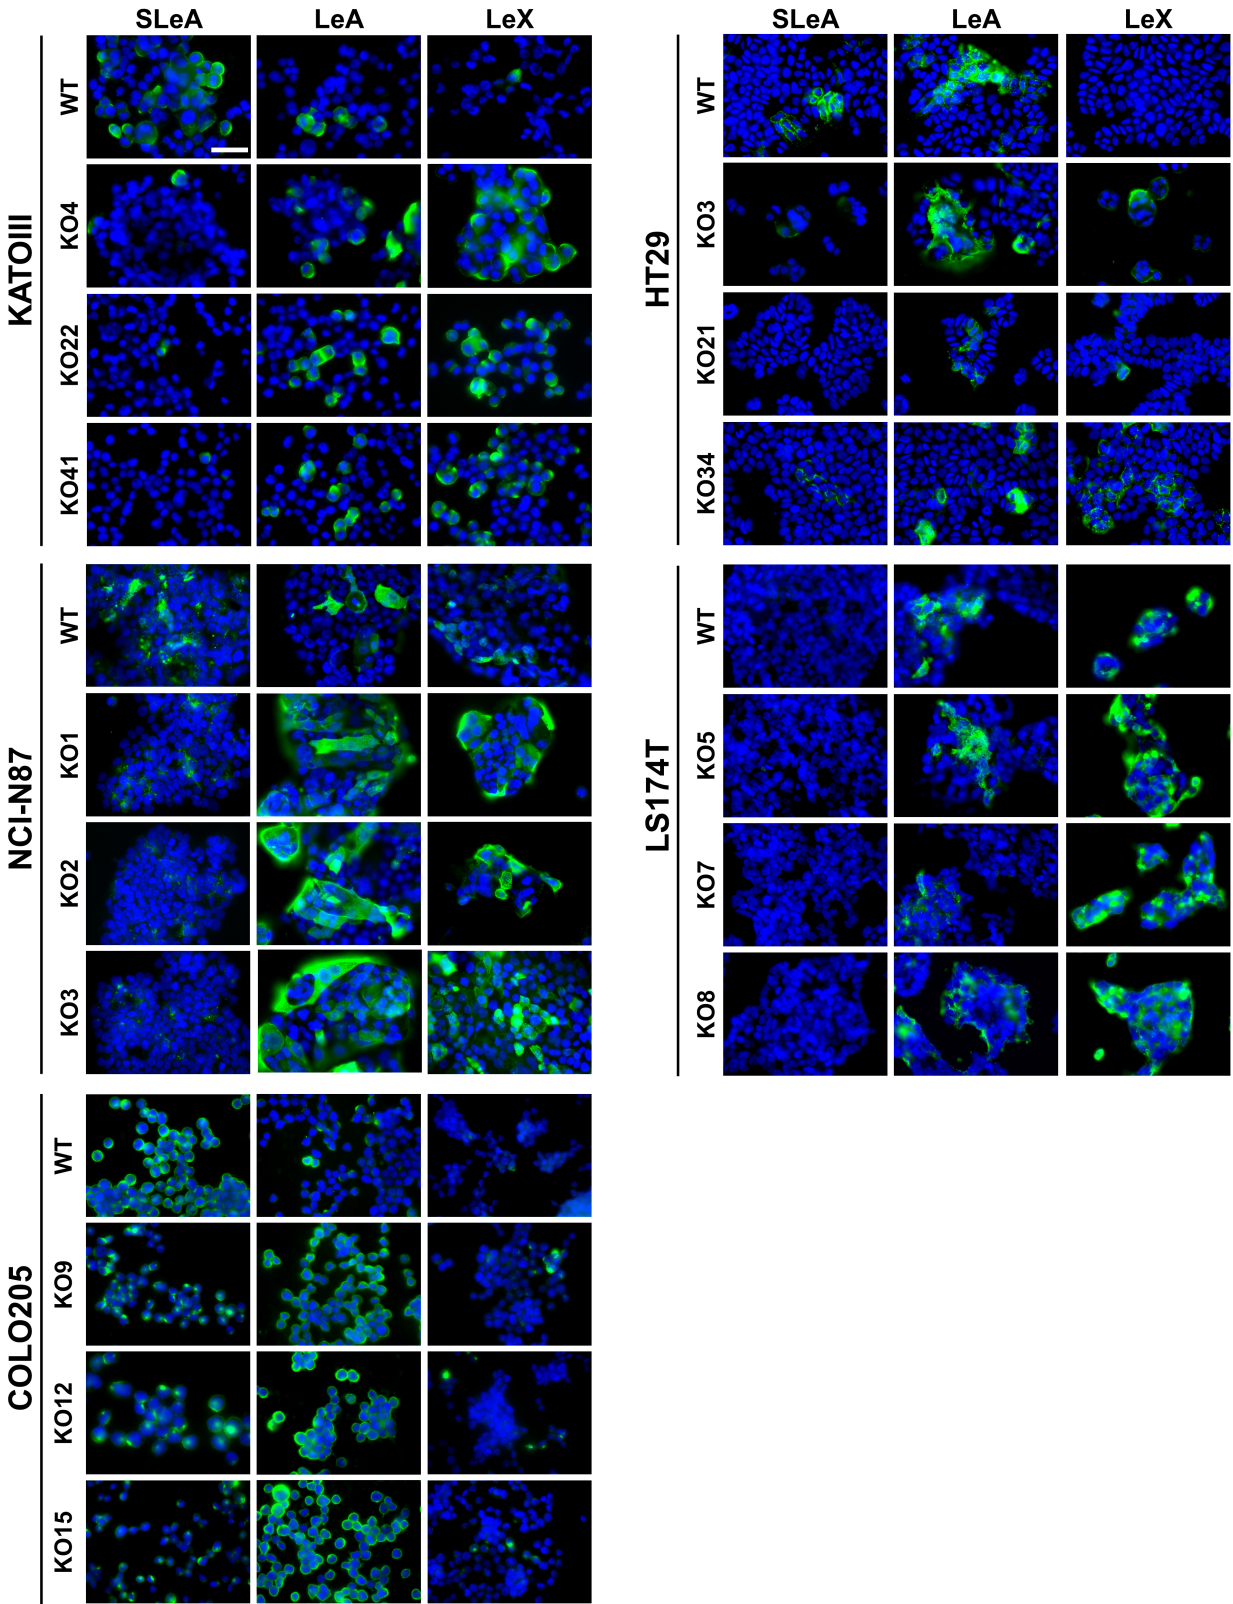

**SFig. 3: Immunofluorescence detection of SLeA, LeA and LeX in ST3GalIV KO GI cancer cells.** Results showing a heterogenous expression of SLeA in the selected WT GI cancer cells with ST3GalIV KO leading to a reduced expression (left panel for each cell line). ST3GalIV KO also results in the increased expression of the Lewis precursors LeA and LeX (middle and right panel for each cell line). The scale bar corresponds to 50  $\mu$ m.

# SFig 4

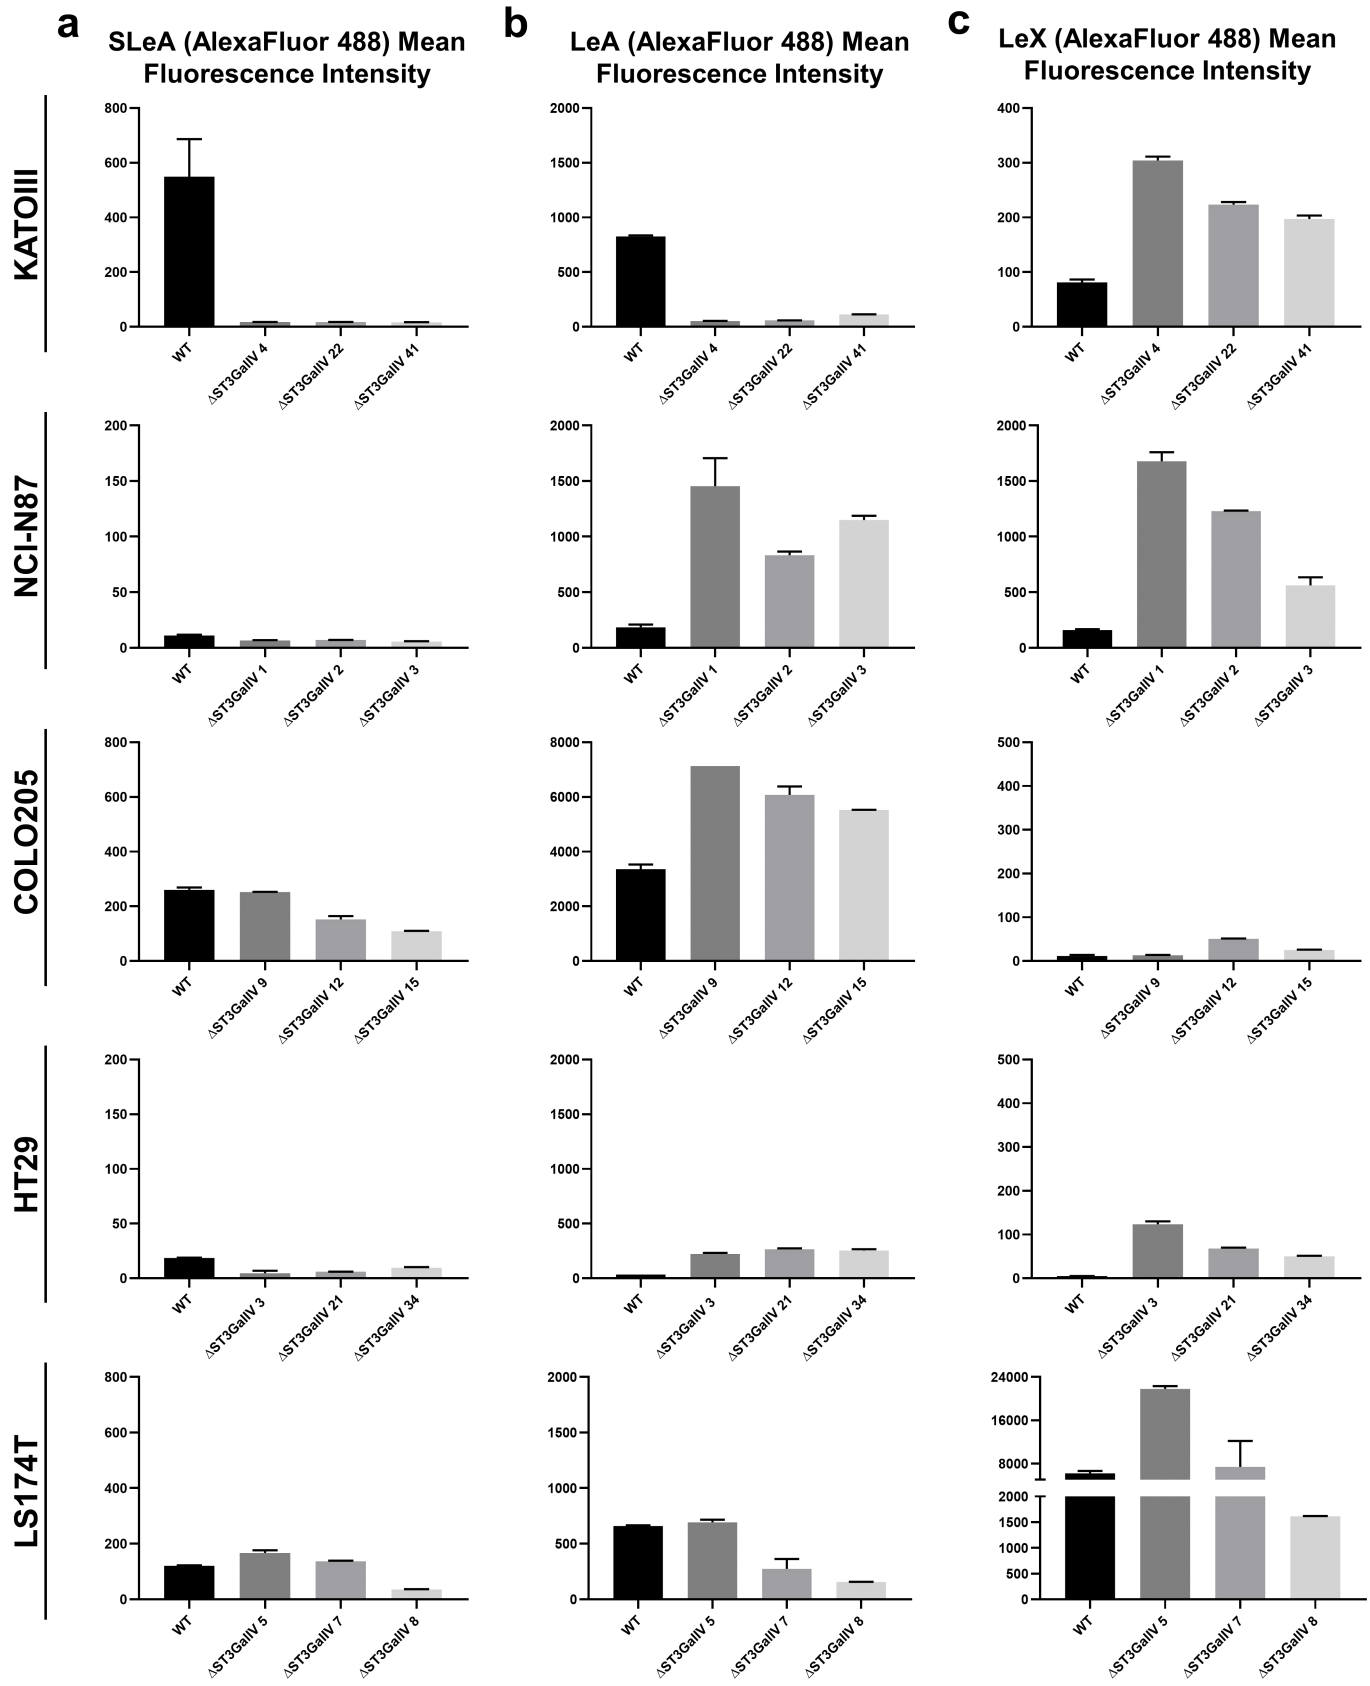

**SFig 4:** Mean fluorescence intensity levels of cell surface SLeA (a), LeA (b) and LeX (c) in WT and ST3GallIV KO clones of KATOIII, NCI-N87, COLO205, HT29 and LS174T cells. Intensity levels were quantified by flow cytometry analysis. Bar graphs show normalized mean intensity of fluorescence (MIF) + SEM, resulting from three independent biological experiments.
